# Supplementary material for: Difference Between Delayed Anastomosis and Early Anastomosis in Damage Control Laparotomy Affecting the Infusion Volume and NPWT Output volume: Is Infusion Restriction Necessary in Delayed Anastomosis? A Single-Center Retrospective Analysis
Source: Research Square preprint supplement (doi:10.21203/rs.3.rs-772713/v1), 2021-08-09
Supplement: Supplementary file 1 [file 0f94cc68a0c11676fbe5e2a8.xlsx]

## Sheet: table3
Table 3. Background factors of early anastomosis and delayed anastomosis in DCL patients
	DCL early anastomosis (16)	DCL delay anastomosis (21)	p-value#
Age(years)	65.6±20.1	57.8±19.1	0.104
Sex
Male	8(50%)	12(57%)	0.6658
Cause of surgery			0.0063
trauma	5(31%)	16(76%)
colon injury	1(20%)	12(75%)	0.0271
lower gastrointestinal perforation	11(69%)	5(24%)
Injury severity score	28.6±11.4	27.0±10.2	0.8042
APACHEⅡscore	28.8±7.6	25.0±6.4	0.1445
pre-initial surgery
temperature(℃)	37.0±0.9	36..6±1.2	0.1323
Mean pressure	98.0±11.8	84.9±23.3	0.0573
pH	7.39±0.09	7.39±0.06	0.7129
Base excess(mmol/L)	–1.96±4.2	–2.44±4.8	0.2695
INR	1.20±0.3	1.13±0.21	0.7381
Alb(g/dL)	3.43±0.8	3.42±0.8	0.9143
Cre(mg/dL)	1.17±1.8	1.18±0.8	0.0399
post-initial surgery
Alb(g/dL)	2.00±0.4	2.30±0.6	0.1274
Cre(mg/dL)	1.18±1.7	0.96±0.7	0.7944
48 hours after initial surgery
Alb(g/dL)	2.05±0.3	2.38±0.4	0.0194
Cre(mg/dL)	1.31±1.7	1.12±0.7	0.5295
Duration of initial surgery(min)	172.2±48.3	108.9±31.4	0.0001
trauma	151.0±47.1	108.5±32.4	0.0474
lower gastrointestinal perforation	181.9±47.7	110.2±31.4	0.0149
Bleeding during initial surgery((ml)	547.1±582.5	2294.0±2391.1	0.0553
trauma	1096.8±778.6	2991.3±2333.4	0.0829
lower gastrointestinal perforation	297.2±216.2	62.8±29.0	0.0234
Red blood cell transfusions(ml)	105.0±231.4	478.0±604.7	0.018
Up to 48 hours after the initial surgery
Total crystalloid administration(ml)	10557.7±2870.9	12493.1±5297.0	0.2318
Total NPWT output(ml)	1255.0±588.4	1208.1±614.5	0.7128
Total urine output(ml)	3305.4±2009.1	3220.3±1823.3	0.9145
OA duration(day)	5.4±2.6	3.9±3.3	0.0301
Vasopressor infusion	6(38%)	8(38%)	0.9705
Albumin administration	10(63%)	15(71%)	0.5654
renal replacement therapy	3(19%)	7(33%)	0.3224
PMX-DHP	8(50%)	6(29%)	0.183
postoperative complications
Surgical site infection	5(31%)	10(48%)	0.315
adhesive intestinal obstruction	1(6%)	2(10%)	0.7178
anastomotic leak	1(6%)	1(5%)	0.8428
Death within 28 days	1(6%)	0	0.2455
Data presented as mean±SD or number of patients with percentage. #Wilcoxon rank-sum test or Chi-squared test. PMX-DHP=Direct hemoperfusion with polymyxin B-immobilized fiber OA=open abdomen,NPWT=negative pressure wound therapy
